# Supplementary material for: Microsatellite Analysis Revealed Potential DNA Markers for Gestation Length and Sub-Population Diversity in Kari Sheep
Source: MDPI journal article supplement (doi:10.3390/ani12233292), 2022-11-25
Supplement: s1 [file s1]

**Table S1: Primer sequences for microsatellite DNA markers recommended for genetic diversity studies in sheep.**

| Name      | Primer sequence forward and reverse                                 | Annealing temp | Chromosome location | Map distance cM |
|-----------|---------------------------------------------------------------------|----------------|---------------------|-----------------|
| MAF65     | AAAGGCCAGAGTATGCAATTAGGAG<br>CCACTCCTCCTGAGAATATAACATG              | 60°C           | 15                  | 31.2            |
| OarFCB193 | TTCATCTCAGACTGGGATTCAGAAAGGC<br>GCTTGGAATAACCCTCCTGCATCCC           | 54°C           | 11                  | 67.8            |
| OarJMP29  | GTATACACGTGGACACCGCTTTGTAC<br>GAAGTGGCAAGATTCAGAGGGGAAG             | 56°C           | 24                  | 4.5             |
| OarJMP58  | GAAGTCATTGAGGGGTCGCTAACC<br>CTTCATGTTACAGGGTCAGGG                   | 58°C           | 26                  | 50.3            |
| OarFCB304 | CCCTAGGAGCTTTCAATAAAGAATCGG<br>CGCTGCTGTCAACTGGGTCAGGG              | 56°C           | 19                  | 66.3            |
| BM8125    | CTCTATCTGTGGAAGAGTGGG<br>GGGGGTTAGACTTCAACATACG                     | 50°C           | 17                  | 80.2            |
| OarFCB128 | ATAAAGCATCTTCTCTTTATTTCTCGC<br>CAGCTGAGCAACTAAGACATACATGCG          | 55°C           | 2p                  | 96.0            |
| OarCP34   | GCTGAACAATGTGATATGTTTCAGG<br>GGGACAATACTGTCTTAGATGCTGC              | 50°C           | 3p                  | 39.1            |
| OarVH72   | GGCCTCTCAAGGGGCAAGAGCAGG<br>CTCTAGAGGATCTGGAATGCAAAGCTC             | 57°C           | 25                  | 44.5            |
| OarHH47   | TTTATTGACAACTCTCTTCTTAACCTCCACC<br>GTAGTTATTTAAAAAATATCATACCTCTTAAG | 58°C           | 18                  | 77.7            |
| DYMS1     | AACAACATCAAACAGTAAGAG<br>CATAGTAACAGATCTTCCTACA                     | 59°C           | 20                  | 11.6            |
| SRCRSP1   | TGCAAGAAGTTTTCCAGAGC<br>ACCCTGGTTTCACAAAAGG                         | 54°C           | Unknown             |                 |
| SRCRSP5   | GGAATCTACCAACTGAGCTACAAG<br>GTTTCTTTGAAATGAAGCTAAAGCAATGC           | 56°C           | 21                  |                 |
| SRCRSP9   | AGAGGATCTGGAATGGAATC<br>GCACTCTTTTCAGCCCTAATG                       | 55°C           | 12                  |                 |
| MCM140    | GTTCTGACTTCTGGGTAAGTGGTCTC<br>GTCCATGGATTTGCAGAGTCAG                | 60°C           | 6                   | 93.4            |
| MAF33     | GATCTTTGTTTCAATCTATTCCAATTTTC<br>GATCATCTGAGTGTGAGTATATACAG         | 60°C           | 9                   | 60.0            |
| MAF209    | GATCACAAAAAGTTGGATACAACCGTGG<br>TCATGCACTTAAGTATGTAGGATGCTG         | 63°C           | 17                  | 46.7            |
| INRA63    | ATTTGCACAAGCTAAATCTAACC<br>AAACCACAGAAATGCTTGGAAG                   | 58°C           | 14                  | 62.9            |
| OarFCB20  | AAATGTGTTTAAGATTCCATACAGTG<br>GGAAAACCCCATATATACCTATAC              | 56°C           | 2q                  | 190.2           |
| BM1329    | TTGTTTAGGCAAGTCCAAAGTC<br>AACACCGCAGCTTCATCC                        | 50°C           | 6                   | 42.2            |
| MAF214    | GGGTGATCTTAGGGAGGTTTTGGAGG<br>AATGCAGGAGATCTGAGGCAGGGACG            | 58°C           | 16                  | 43.9            |

|           |                                                                |      |    |       |
|-----------|----------------------------------------------------------------|------|----|-------|
| ILSTS11   | GCTTGCTACATGGAAAGTGC<br>CTAAAAGTCAGAGCCCTACC                   | 55°C | 9  | 41.0  |
| MCM527    | GTCCATTGCCTCAAATCAATTC<br>AAACCACTTGACTACTCCCCAA               | 58°C | 5  | 120.3 |
| OarFCB226 | CTATATGTTGCCTTTCCTTCCTGC<br>GTGAGTCCCATAGAGCATAAGCTC           | 60°C | 2  | 44.9  |
| ILSTS28   | TCCAGATTTTGTACCAGACC<br>GTCATGTCATACCTTTGAGC                   | 53°C | 3  | 34.0  |
| MAF70     | CACGGAGTCACAAAGAGTCAGACC<br>GCAGGACTCTACGGGGCCTTTGC            | 60°C | 4  | 51.6  |
| BM1824    | GAGCAAGGTGTTTTTCCAATC<br>CATTCTCCAAGTCTTCCTTG                  | 58°C | 1q | 292.5 |
| OarAE129  | AATCCAGTGTGTGAAAGACTAATCCAG<br>GTAGATCAAGATATAGAATATTTTCAACACC | 54°C | 5  | 115.4 |
| HUJ616    | TTCAAATACACATTGACAGGG<br>GGACCTTTGGCAATGGAAGG                  | 54°C | 13 | 2.5   |
| OarCP38   | CAATTTGGTGCATATTCAAGGTTGC<br>GCAGTCGCAGCAGGCTGAAGAGG           | 52°C | 10 | 93.3  |
| ILSTS5    | GGAAGCAATGAAATCTATAGCC<br>TGTTCTGTGAGTTTGTAAGC                 | 55°C | 7  | 127.1 |

**Table S2. Shared and unique alleles in Kari subtypes.**

| Locus        | Number of alleles | Shared alleles |           |           |           | Unique alleles |          |           |
|--------------|-------------------|----------------|-----------|-----------|-----------|----------------|----------|-----------|
|              |                   | S-M            | S-L       | M-L       | S-M-L     | S              | M        | L         |
| OarJMP58     | 12                | 4              | 3         | 7         | 3         | 2              |          | 2         |
| INRA63       | 12                | 6              | 4         | 8         | 4         |                |          |           |
| OarVH72      | 11                | 5              | 7         | 5         | 4         |                | 1        | 1         |
| DYMS1        | 10                | 6              | 6         | 7         | 6         | 1              |          | 2         |
| OarFCB304    | 8                 | 2              | 1         | 4         | 1         | 2              | 1        |           |
| ILSTS11      | 8                 | 2              | 0         | 1         | 0         | 1              | 1        | 2         |
| OarJMP29     | 8                 | 5              | 5         | 5         | 4         |                | 1        |           |
| SRCRSP1      | 8                 | 2              | 1         | 4         | 1         |                | 1        | 2         |
| MAF214       | 7                 | 4              | 3         | 3         | 2         |                |          | 1         |
| BM1824       | 7                 | 5              | 4         | 6         | 4         |                |          |           |
| MCM527       | 7                 | 2              | 4         | 4         | 2         |                |          | 1         |
| MCM140       | 7                 | 4              | 3         | 5         | 3         | 1              | 1        |           |
| ILSTS5       | 7                 | 4              | 2         | 4         | 2         |                |          | 1         |
| BM1329       | 7                 | 2              | 3         | 4         | 2         |                |          | 1         |
| SRCRSP5      | 7                 | 3              | 2         | 4         | 2         | 1              |          |           |
| HUJ616       | 6                 | 2              | 2         | 4         | 2         |                | 1        | 1         |
| OarFCB226    | 6                 | 2              | 2         | 5         | 2         | 1              |          |           |
| MAF33        | 5                 | 2              | 3         | 2         | 3         | 1              |          | 1         |
| SRCRSP9      | 5                 | 3              | 4         | 4         | 3         |                |          |           |
| BM8125       | 4                 | 3              | 1         | 1         | 1         |                | 1        |           |
| MAF65        | 4                 | 4              | 2         | 2         | 2         |                |          |           |
| OarFCB193    | 2                 | 1              | 1         | 2         | 1         |                |          |           |
| <b>Total</b> | <b>158</b>        | <b>73</b>      | <b>63</b> | <b>91</b> | <b>54</b> | <b>10</b>      | <b>8</b> | <b>15</b> |

Key: S = Kari-S; M = Kari-M; L = Kari-L.

Table S3: Allele sizes and their frequencies in different Kari sheep subtypes

| Locus     | Allele | Size | Population   |              |              | Locus   | Allele | Size | Population   |              |              |
|-----------|--------|------|--------------|--------------|--------------|---------|--------|------|--------------|--------------|--------------|
|           |        |      | Kari-S       | Kari-M       | Kari-L       |         |        |      | Kari-S       | Kari-M       | Kari-L       |
| OarJMP58  | A      | 123  |              |              | <b>0.083</b> | INRA63  | A      | 155  |              | 0.046        | 0.136        |
|           | B      | 126  |              |              | <b>0.042</b> |         | B      | 158  | 0.083        | 0.273        |              |
|           | C      | 129  |              | 0.050        | 0.083        |         | C      | 166  | 0.167        | 0.046        | 0.227        |
|           | D      | 132  | <b>0.167</b> |              |              |         | D      | 170  |              | 0.182        | 0.046        |
|           | E      | 135  |              | 0.050        | 0.125        |         | E      | 174  | 0.083        | 0.091        | 0.091        |
|           | F      | 138  |              | 0.200        | 0.125        |         | F      | 178  |              | 0.046        | 0.091        |
|           | G      | 141  | 0.250        | 0.050        | 0.167        |         | G      | 182  | 0.167        | 0.046        |              |
|           | H      | 144  |              | 0.200        | 0.083        |         | H      | 190  | 0.167        | 0.046        | 0.136        |
|           | I      | 148  | 0.167        | 0.100        | 0.125        |         | I      | 195  |              | 0.182        | 0.091        |
|           | J      | 158  | 0.250        | 0.250        | 0.167        |         | J      | 199  | 0.167        | 0.046        | 0.046        |
|           | K      | 178  | 0.083        | 0.100        |              |         | K      | 209  | 0.167        |              | 0.136        |
|           | L      | 198  | <b>0.083</b> |              |              |         | L      | 219  |              |              |              |
|           | Null   |      |              |              |              |         | Null   |      |              |              |              |
| OarVH72   | A      | 126  |              |              | <b>0.083</b> | DYMS1   | A      | 158  | <b>0.083</b> |              |              |
|           | B      | 129  | 0.083        |              | 0.083        |         | B      | 162  |              | 0.091        | 0.227        |
|           | C      | 132  | 0.167        | 0.375        | 0.083        |         | C      | 170  |              |              | <b>0.046</b> |
|           | D      | 135  | 0.167        | 0.062        | 0.041        |         | D      | 178  | 0.083        | 0.136        | 0.091        |
|           | E      | 138  |              | 0.125        | 0.125        |         | E      | 182  | 0.333        | 0.136        | 0.182        |
|           | F      | 144  | 0.083        |              | 0.167        |         | F      | 190  |              |              | <b>0.136</b> |
|           | G      | 148  | 0.167        | 0.062        |              |         | G      | 195  | 0.083        | 0.318        | 0.091        |
|           | H      | 151  | 0.167        | 0.062        | 0.167        |         | H      | 204  | 0.167        | 0.045        | 0.091        |
|           | I      | 155  | 0.083        | 0.250        | 0.083        |         | I      | 209  | 0.167        | 0.045        | 0.046        |
|           | J      | 158  |              | <b>0.062</b> |              |         | J      | 219  | 0.083        | 0.227        | 0.091        |
|           | K      | 162  | 0.083        |              | 0.167        |         | Null   |      |              |              | 0.017        |
|           | Null   |      |              |              | 0.070        |         |        |      |              |              |              |
| OarFCB304 | A      | 144  | <b>0.125</b> |              |              | ILSTS11 | A      | 275  | 0.250        | 0.182        |              |
|           | B      | 155  | <b>0.250</b> |              |              |         | B      | 282  | <b>0.250</b> |              |              |
|           | C      | 158  | 0.250        | 0.312        | 0.200        |         | C      | 295  |              | 0.455        | 0.357        |
|           | D      | 162  |              | 0.062        | 0.300        |         | D      | 302  |              | <b>0.182</b> |              |
|           | E      | 166  |              | <b>0.187</b> |              |         | E      | 316  |              |              | <b>0.287</b> |
|           | F      | 170  | 0.375        | 0.062        |              |         | F      | 331  | 0.500        | 0.136        |              |
|           | G      | 178  |              | 0.250        | 0.100        |         | G      | 331  |              | 0.045        | 0.074        |
|           | H      | 182  |              | 0.125        | 0.400        |         | H      | 339  |              |              | <b>0.287</b> |
|           | Null   |      |              | 0.100        | 0.205        |         | Null   |      |              | 0.200        | 0.249        |
|           |        |      |              |              |              |         |        |      |              |              |              |
| OarJMP29  | A      | 127  | 0.100        | 0.222        | 0.083        | SRCRSP1 | A      | 112  |              |              | <b>0.083</b> |
|           | B      | 132  | 0.100        | 0.111        | 0.250        |         | B      | 117  |              |              | <b>0.208</b> |
|           | C      | 145  |              | 0.333        | 0.167        |         | C      | 123  |              | 0.350        | 0.208        |
|           | D      | 150  | 0.400        | 0.056        |              |         | D      | 129  |              | 0.150        | 0.167        |
|           | E      | 158  | 0.100        | 0.111        | 0.167        |         | E      | 132  | 0.500        | 0.250        | 0.167        |
|           | F      | 165  | 0.200        | 0.111        | 0.083        |         | F      | 141  |              | 0.050        | 0.167        |
|           | G      | 172  | 0.100        |              | 0.250        |         | G      | 148  |              | <b>0.100</b> |              |
|           | H      | 180  |              | <b>0.056</b> |              |         | H      | 151  | 0.500        | 0.100        |              |
|           | Null   |      |              | 0.093        |              |         | Null   |      |              | 0.123        | 0.043        |

| Locus     | Allele | Size | Population   |        |              | Locus  | Allele | Size | Population   |              |              |
|-----------|--------|------|--------------|--------|--------------|--------|--------|------|--------------|--------------|--------------|
|           |        |      | Kari-S       | Kari-M | Kari-L       |        |        |      | Kari-S       | Kari-M       | Kari-L       |
| MAF214    | A      | 339  | 0.333        | 0.636  | 0.208        | BM1824 | A      | 170  | 0.167        | 0.091        |              |
|           | B      | 347  | 0.417        | 0.045  |              |        | B      | 174  |              | 0.546        | 0.056        |
|           | C      | 407  |              |        | <b>0.292</b> |        | C      | 178  | 0.583        | 0.046        | 0.722        |
|           | D      | 426  | 0.083        | 0.182  | 0.042        |        | D      | 186  | 0.083        | 0.091        | 0.056        |
|           | E      | 436  |              | 0.091  | 0.375        |        | E      | 190  | 0.083        | 0.136        | 0.056        |
|           | F      | 447  | 0.083        | 0.045  |              |        | F      | 199  |              | 0.046        | 0.056        |
|           | G      | 457  | 0.083        |        | 0.083        |        | G      | 229  | 0.083        | 0.046        | 0.056        |
|           | Null   |      | 0.152        |        | 0.105        |        | Null   |      | 0.137        | 0.066        | 0.163        |
| MCM527    | A      | 158  |              |        | <b>0.136</b> | MCM140 | A      | 158  |              | 0.250        | 0.071        |
|           | B      | 162  |              | 0.167  | 0.227        |        | B      | 174  |              | <b>0.150</b> |              |
|           | C      | 166  | 0.167        |        | 0.045        |        | C      | 178  | 0.167        | 0.100        | 0.071        |
|           | D      | 170  | 0.333        | 0.333  | 0.136        |        | D      | 182  | 0.333        | 0.250        | 0.357        |
|           | E      | 186  | 0.167        |        | 0.273        |        | E      | 190  | 0.167        | 0.200        | 0.143        |
|           | F      | 190  |              | 0.167  | 0.045        |        | F      | 200  |              | 0.050        | 0.357        |
|           | G      | 195  | 0.333        | 0.333  | 0.136        |        | G      | 209  | <b>0.333</b> |              |              |
|           | Null   |      |              |        | 0.071        |        | Null   |      | 0.232        | 0.051        |              |
| ILSTS5    | A      | 186  |              | 0.250  | 0.090        | BM1329 | A      | 209  | 0.333        | 0.400        | 0.250        |
|           | B      | 195  | 0.250        | 0.150  |              |        | B      | 214  |              | 0.100        | 0.125        |
|           | C      | 200  | 0.250        | 0.100  |              |        | C      | 219  | 0.167        |              | 0.062        |
|           | D      | 214  |              | 0.250  | 0.273        |        | D      | 245  |              | 0.400        | 0.125        |
|           | E      | 219  | 0.167        | 0.200  | 0.045        |        | E      | 257  | 0.333        | 0.100        | 0.187        |
|           | F      | 224  | 0.333        | 0.050  | 0.318        |        | F      | 269  | 0.167        |              | 0.062        |
|           | G      | 240  |              |        | <b>0.201</b> |        | G      | 288  |              |              | <b>0.188</b> |
|           | Null   |      |              |        |              |        | Null   |      |              |              | 0.214        |
| SRCRSP5   | A      | 148  | 0.200        | 0.100  | 0.167        | HUJ616 | A      | 117  |              |              | <b>0.250</b> |
|           | B      | 151  | 0.300        | 0.550  | 0.542        |        | B      | 120  | 0.500        | 0.300        | 0.125        |
|           | C      | 158  |              | 0.050  | 0.125        |        | C      | 126  |              | 0.100        | 0.125        |
|           | D      | 174  | <b>0.200</b> |        |              |        | D      | 132  |              | 0.100        | 0.125        |
|           | E      | 178  | 0.300        | 0.100  |              |        | E      | 138  | 0.500        | 0.300        | 0.375        |
|           | F      | 182  |              | 0.100  | 0.125        |        | F      | 148  |              | <b>0.200</b> |              |
|           | G      | 186  |              | 0.100  | 0.042        |        | Null   |      |              | 0.133        |              |
|           | Null   |      |              | 0.161  | 0.252        |        |        |      |              |              |              |
| OarFCB226 | A      | 110  |              | 0.143  | 0.143        | MAF33  | A      | 120  | 0.167        | 0.500        | 0.350        |
|           | B      | 117  | 0.833        | 0.143  | 0.357        |        | B      | 132  | 0.333        | 0.500        | 0.300        |
|           | C      | 120  |              | 0.149  | 0.214        |        | C      | 138  |              |              | <b>0.250</b> |
|           | D      | 129  |              | 0.143  | 0.214        |        | D      | 144  | 0.167        |              | 0.100        |
|           | E      | 151  | 0.083        | 0.143  | 0.071        |        | E      | 155  | <b>0.333</b> |              |              |
|           | F      | 174  | <b>0.083</b> |        |              |        | Null   |      |              |              |              |
|           | Null   |      | 0.251        | 0.095  | 0.126        |        |        |      |              |              |              |
|           |        |      |              |        |              |        |        |      |              |              |              |
| SRCRSP9   | A      | 110  |              | 0.350  | 0.318        | BM8125 | A      | 110  | 0.375        | 0.333        | 1.000        |
|           | B      | 112  | 0.667        | 0.350  | 0.272        |        | B      | 112  | 0.125        | 0.167        |              |
|           | C      | 117  | 0.083        | 0.100  | 0.136        |        | C      | 117  |              | <b>0.333</b> |              |
|           | D      | 126  | 0.167        | 0.200  | 0.181        |        | D      | 123  | 0.500        | 0.167        |              |
|           | E      | 135  | 0.083        |        | 0.091        |        | Null   |      | 0.558        | 0.217        |              |
|           | Null   |      | 0.143        | 0.033  | 0.273        |        |        |      |              |              |              |
|           |        |      |              |        |              |        |        |      |              |              |              |

| Locus | Allele | Size | Population |        |        | Locus         | Allele | Size | Population |        |        |
|-------|--------|------|------------|--------|--------|---------------|--------|------|------------|--------|--------|
|       |        |      | Kari-S     | Kari-M | Kari-L |               |        |      | Kari-S     | Kari-M | Kari-L |
| MAF65 | A      | 79   | 0.500      | 0.636  | 0.667  | OarFCB1<br>93 | A      | 79   |            | 0.364  | 0.091  |
|       | B      | 110  | 0.300      | 0.273  | 0.333  |               | B      | 100  | 1.000      | 0.636  | 0.909  |
|       | C      | 132  | 0.100      | 0.046  |        |               | Null   |      |            | 0.798  | 0.953  |
|       | D      | 144  | 0.100      | 0.046  |        |               |        |      |            |        |        |
|       | Null   |      | 0.072      | 0.061  |        |               |        |      |            |        |        |

Bold numbers indicate unique alleles
